# Supplementary material for: Synergic Effect of Phthalide Lactones and Fluconazole and Its New Analogues as a Factor Limiting the Use of Azole Drugs against Candidiasis
Source: MDPI journal article supplement (doi:10.3390/antibiotics11111500), 2022-10-28
Supplement: s1 [file s1]

# Synergic Effect of Phthalide Lactones and Fluconazole and Its New Analogues as a Factor Limiting the Use of Azole Drugs against Candidiasis

Piotr Krężel <sup>1,\*</sup>, Teresa Olejniczak <sup>1,\*</sup>, Aleksandra Tołoczko <sup>2</sup>, Joanna Gach <sup>1</sup>, Marek Weselski <sup>2</sup> and Robert Bronisz <sup>2</sup>

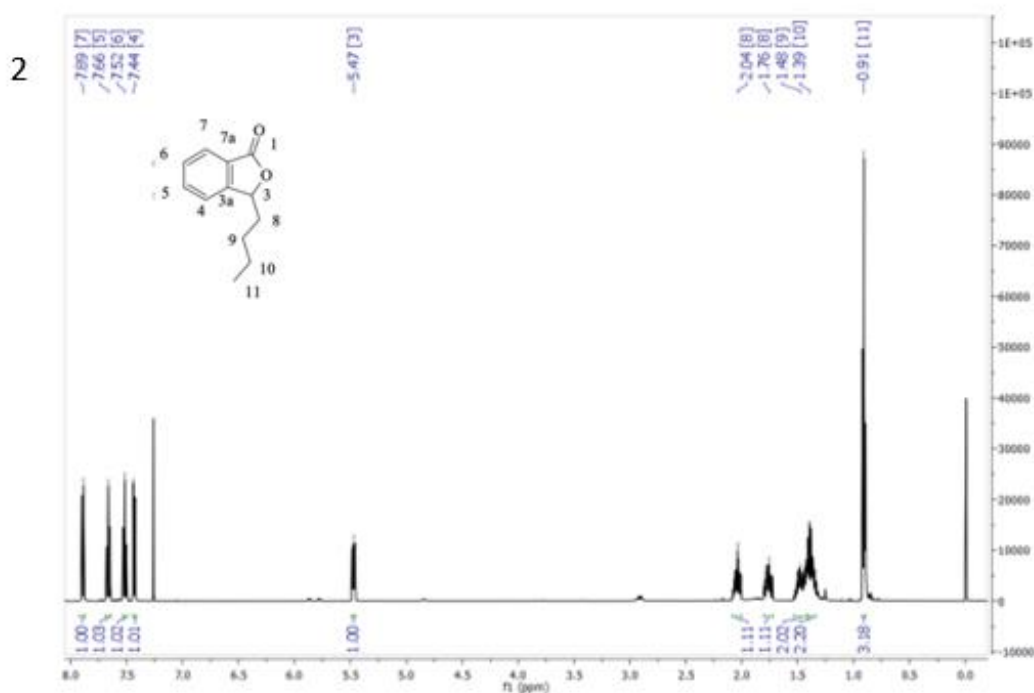

Figure S-1a. <sup>1</sup>H NMR of 3-*n*-butylphthalide (2).

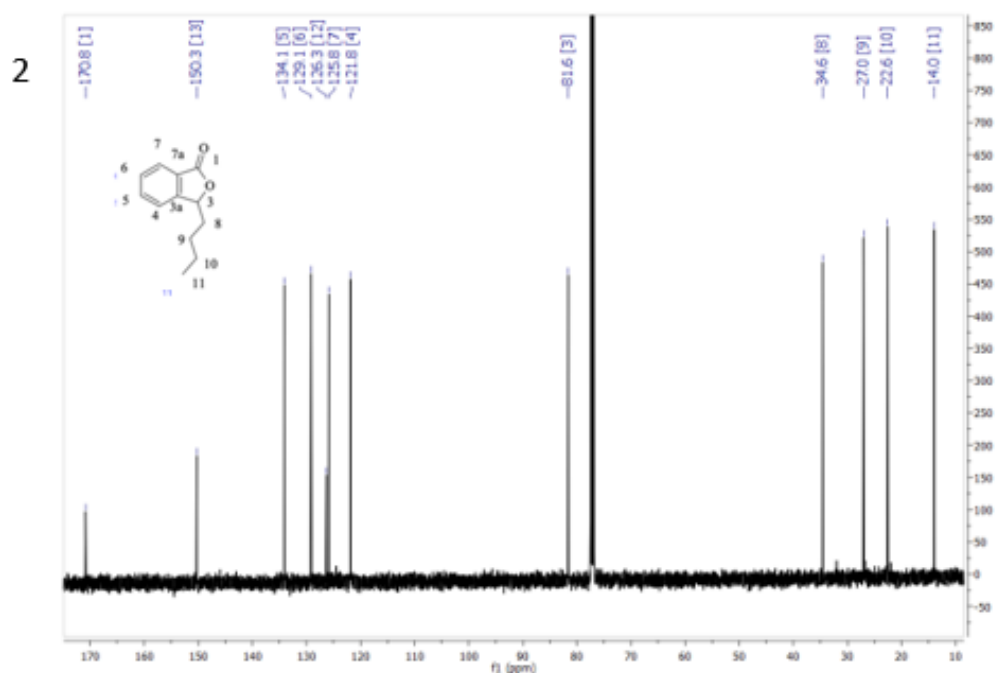

Figure S-1b. <sup>13</sup>C NMR of 3-*n*-butylphthalide (2).

3

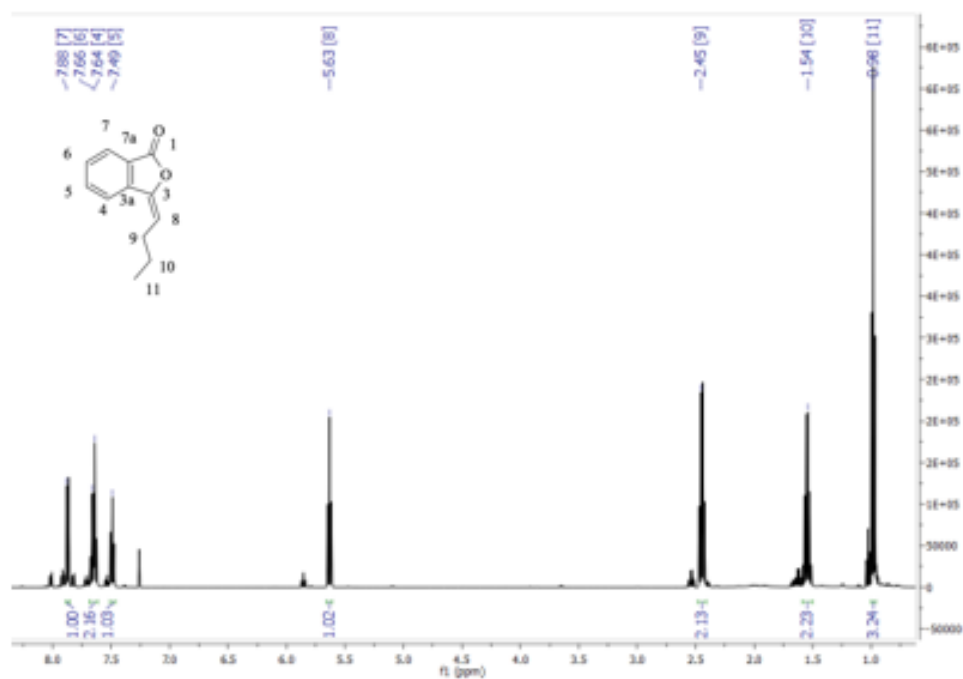

Figure S-2a. <sup>1</sup>H NMR of 3-butyldenephthalide (3).

3

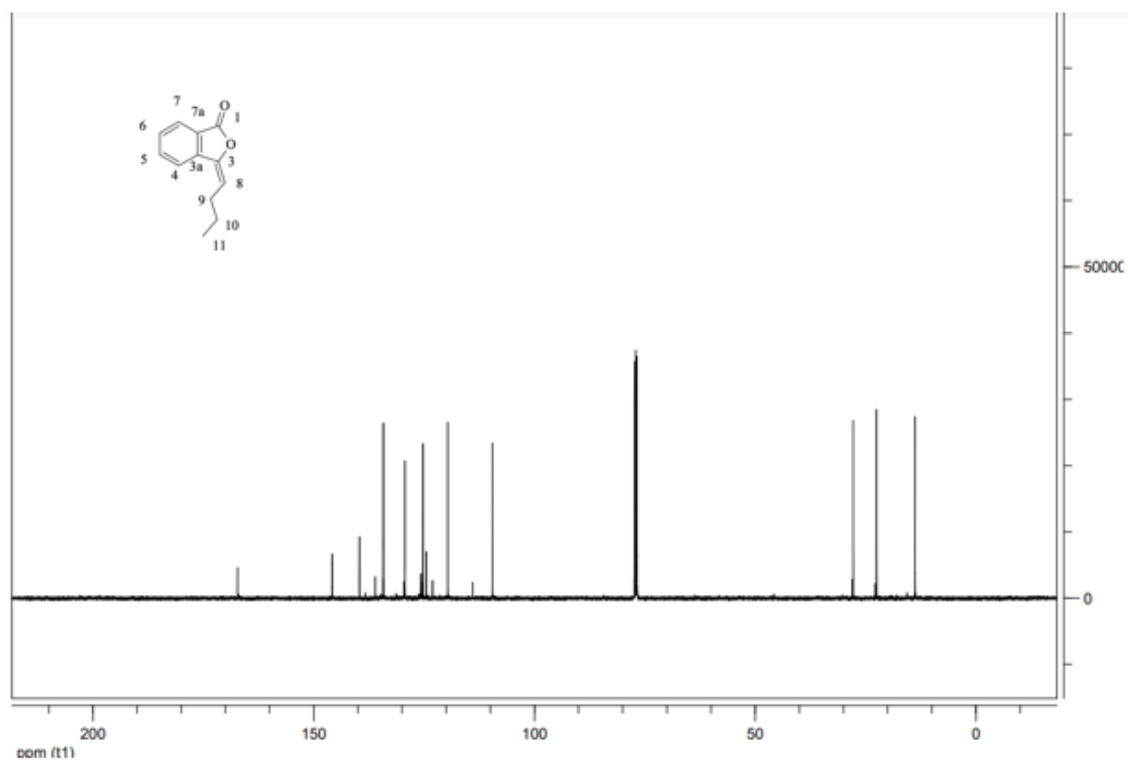

Figure S-2b. <sup>13</sup>C NMR of 3-butyldenephthalide (3).

4

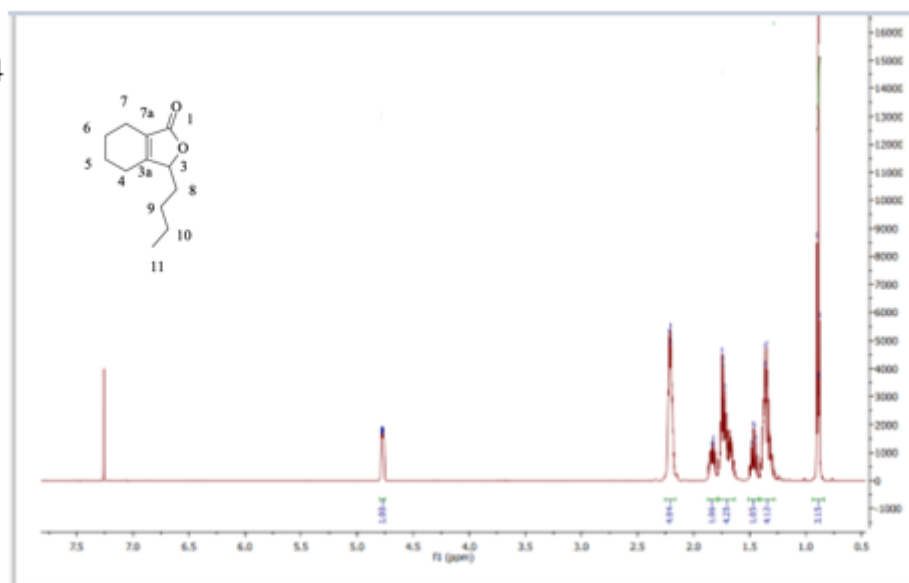

**Figure S-3a.**  $^1\text{H}$  NMR of 3-butyl-4,5,6,7-tetrahydrophthalide (4).

4

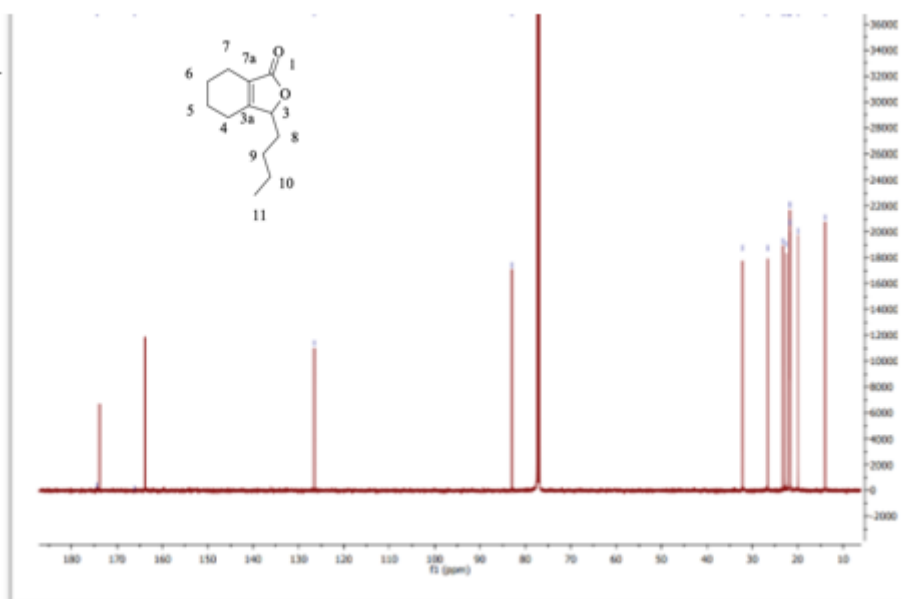

**Figure S-3b.**  $^{13}\text{C}$  NMR of 3-Butyl-4,5,6,7-tetrahydrophthalide (4)

5

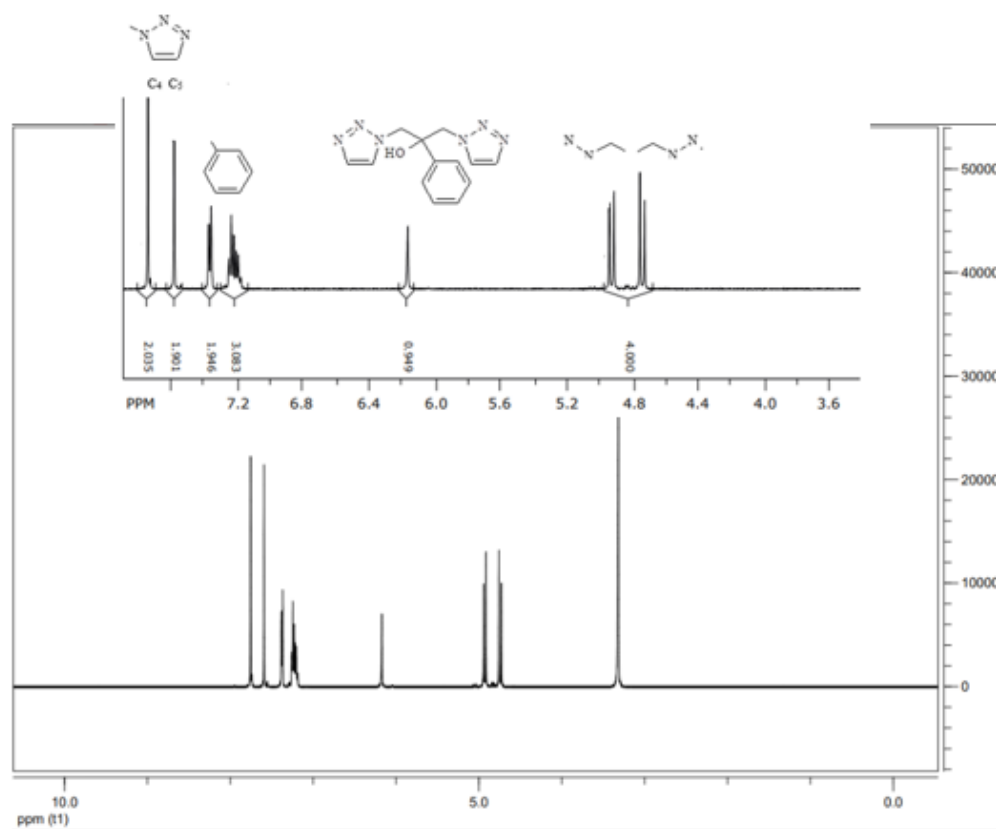

Figure S-4a. <sup>1</sup>H NMR of 1,3-bis(1H-1,2,3-triazol-1-yl)-2-phenylpropan-2-ol (5).

5

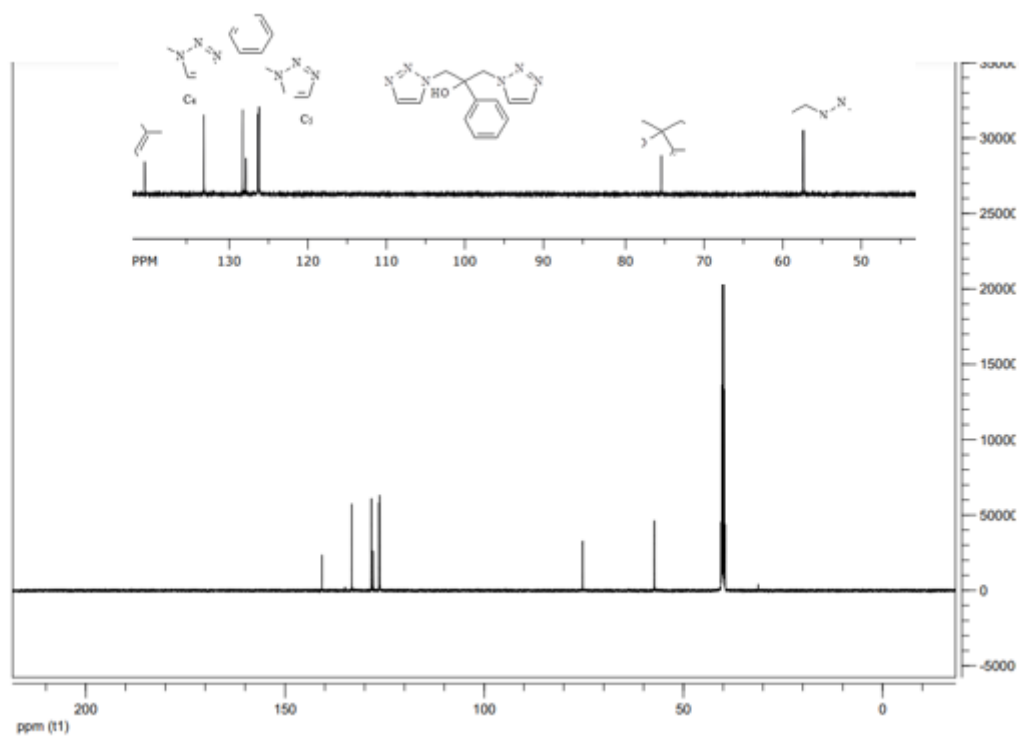

Figure S-4b. <sup>13</sup>C NMR of 1,3-bis(1H-1,2,3-triazol-1-yl)-2-phenylpropan-2-ol (5).

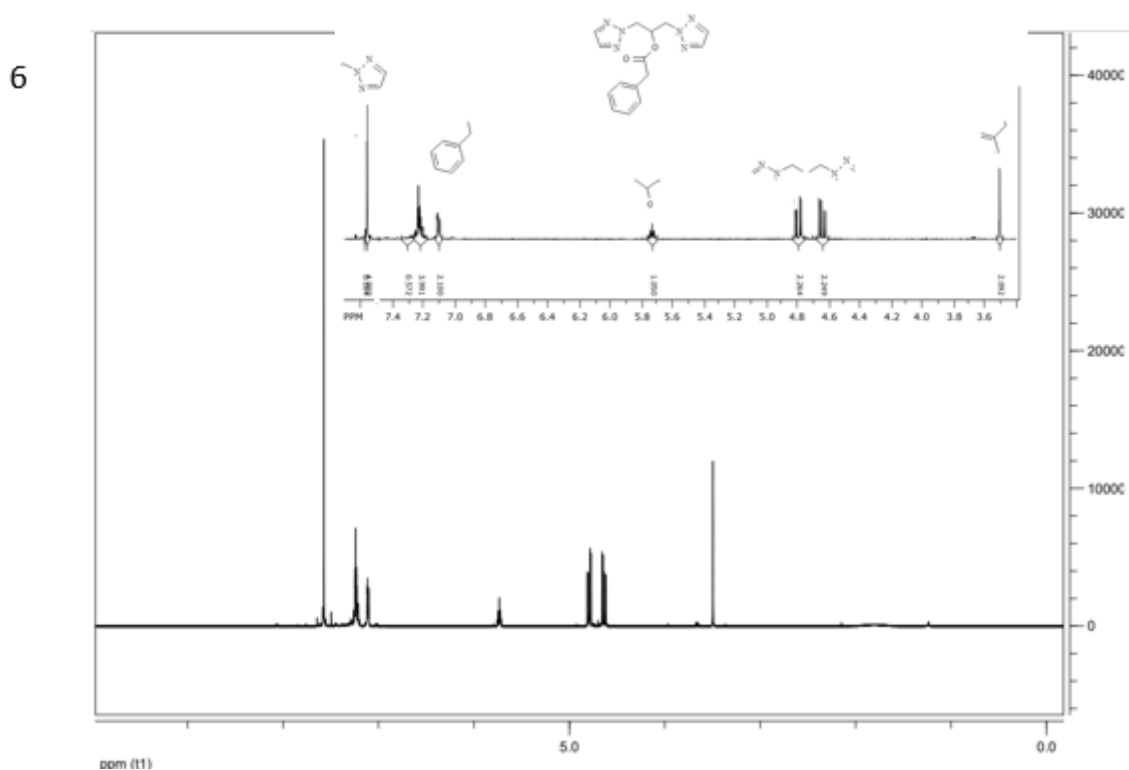

Figure S-5a.  $^1\text{H}$  NMR of 1,3-di(1,2,3-triazol-2-yl)propan-2-yl phenylacetate (6).

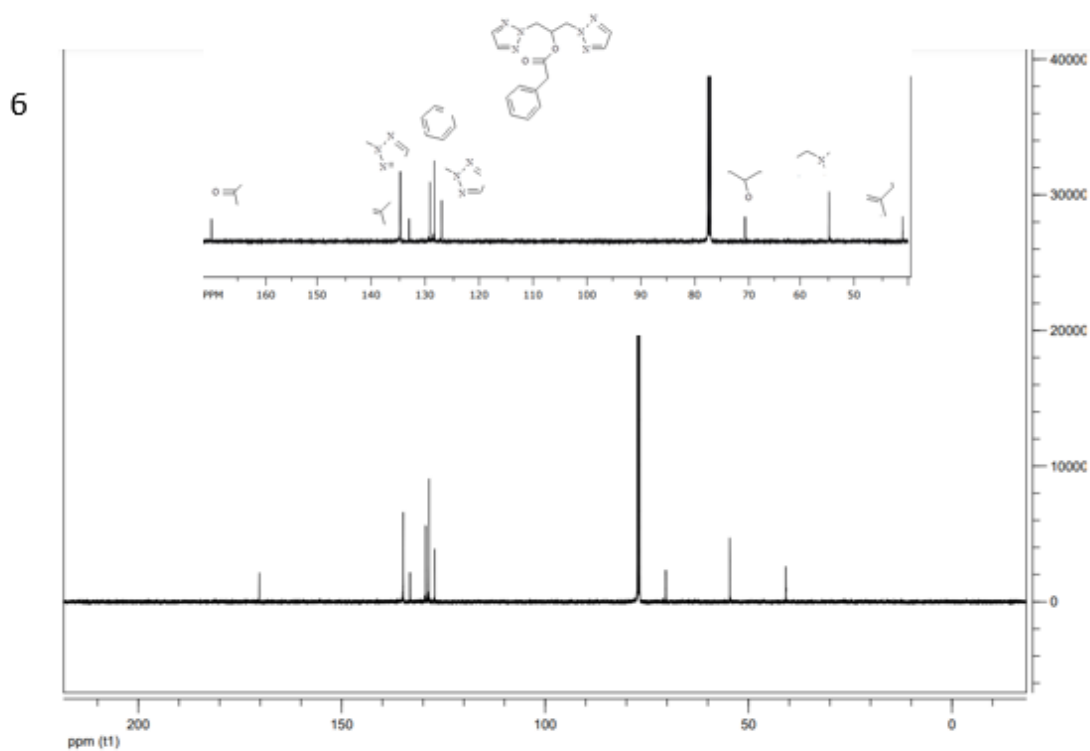

Figure S-5b.  $^{13}\text{C}$  NMR of 1,3-di(1,2,3-triazol-2-yl)propan-2-yl phenylacetate (6).

1

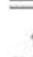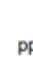

8

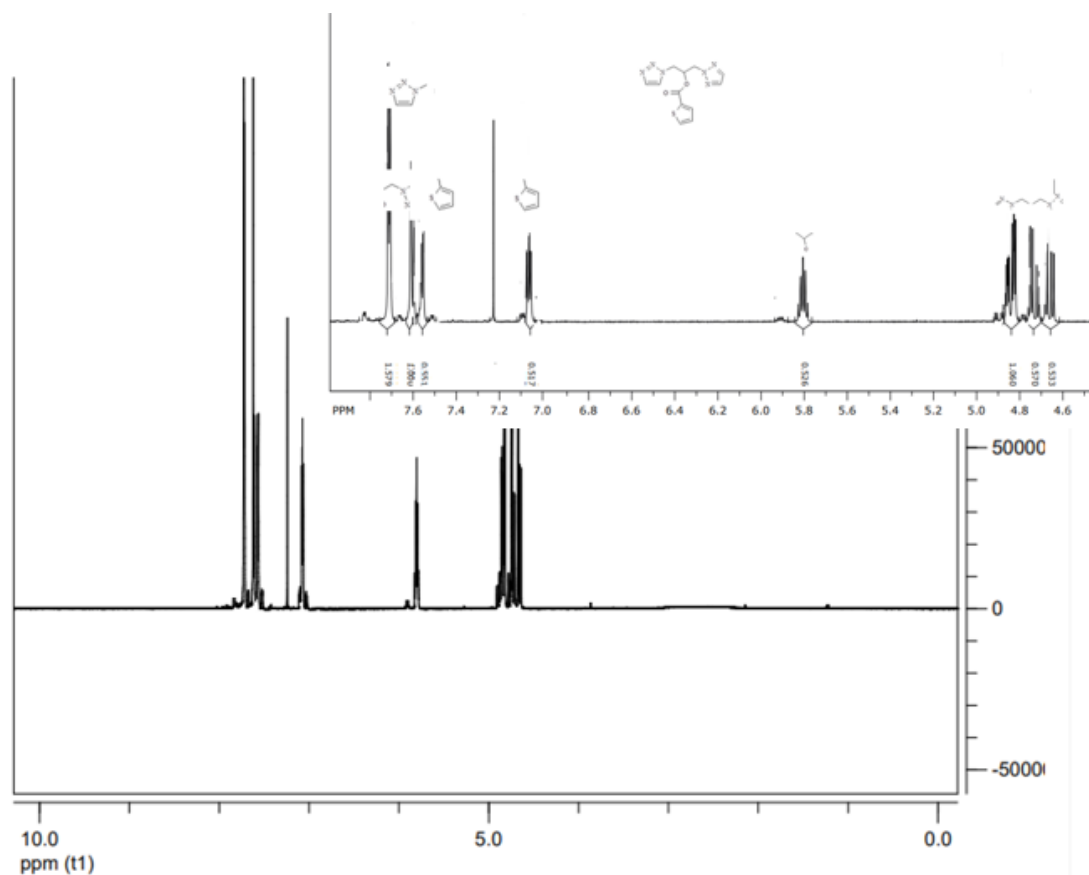

Figure S-7a. <sup>1</sup>H NMR of 1-(1,2,3-triazol-1-yl)-3-(1,2,3-triazol-2-yl)propan-2-yl 2-phenylacetate (8).

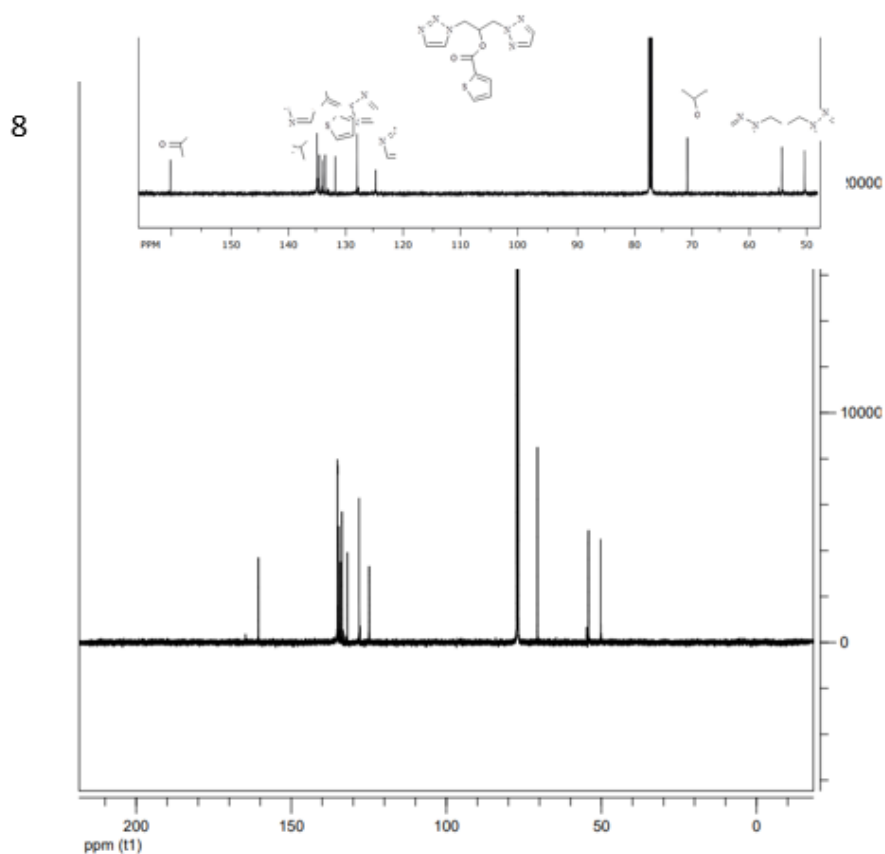

Figure S-7b. <sup>13</sup>C NMR of 1-(1,2,3-triazol-1-yl)-3-(1,2,3-triazol-2-yl)propan-2-yl 2-phenylacetate (8).

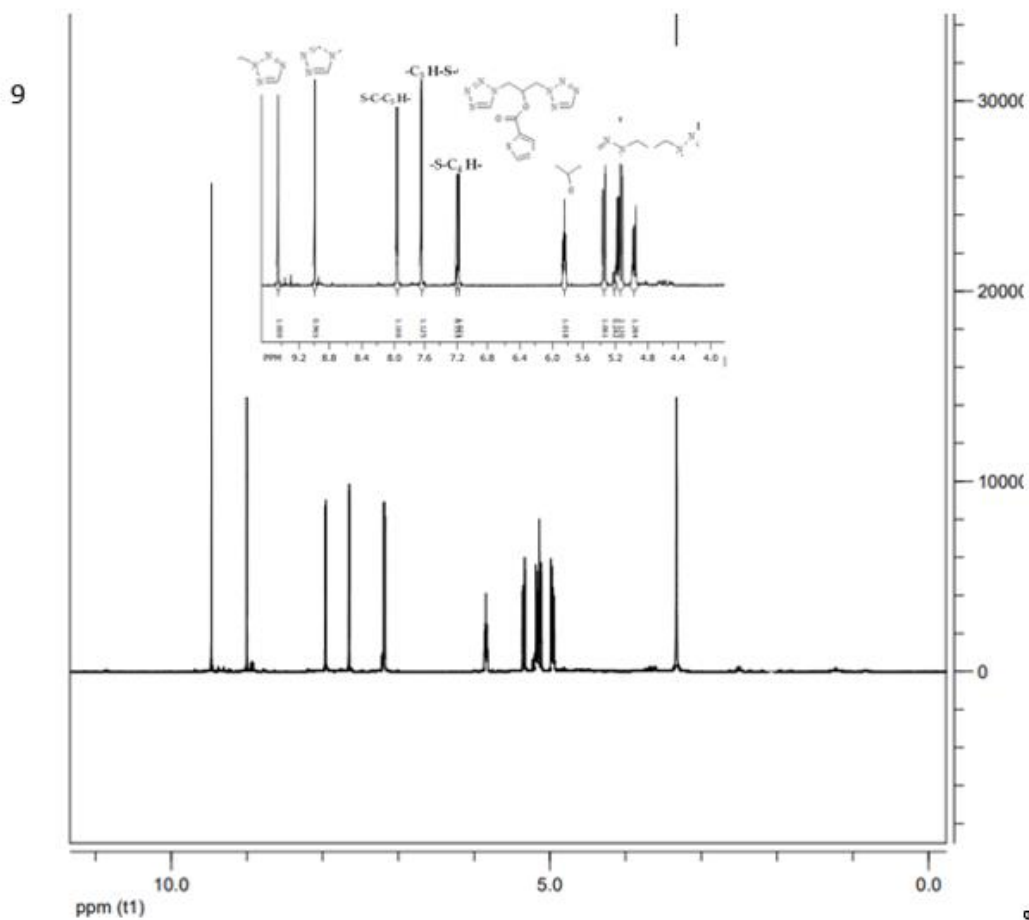

Figure

S-8a.  $^1\text{H}$  NMR of 1-(tetrazol-1-yl)-3-(tetrazol-2-yl)propan-2-yl 2-tiophenylacetate (9).

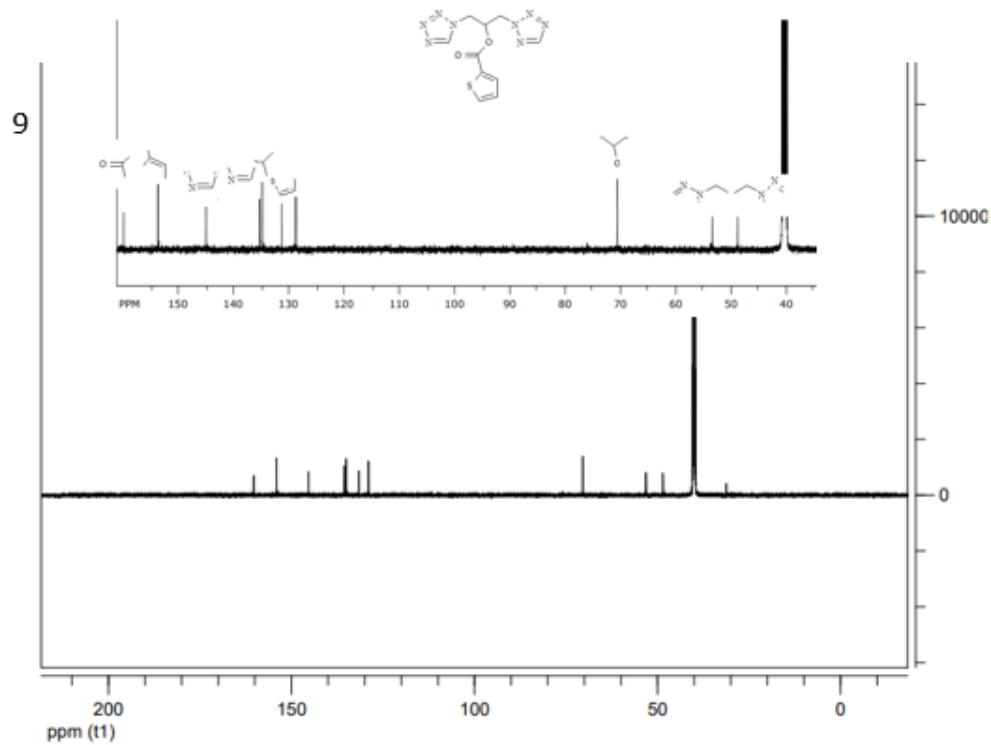

Figure S-8b.  $^{13}\text{C}$  NMR of 1-(tetrazol-1-yl)-3-(tetrazol-2-yl)propan-2-yl 2-tiophenylacetate (9).



10

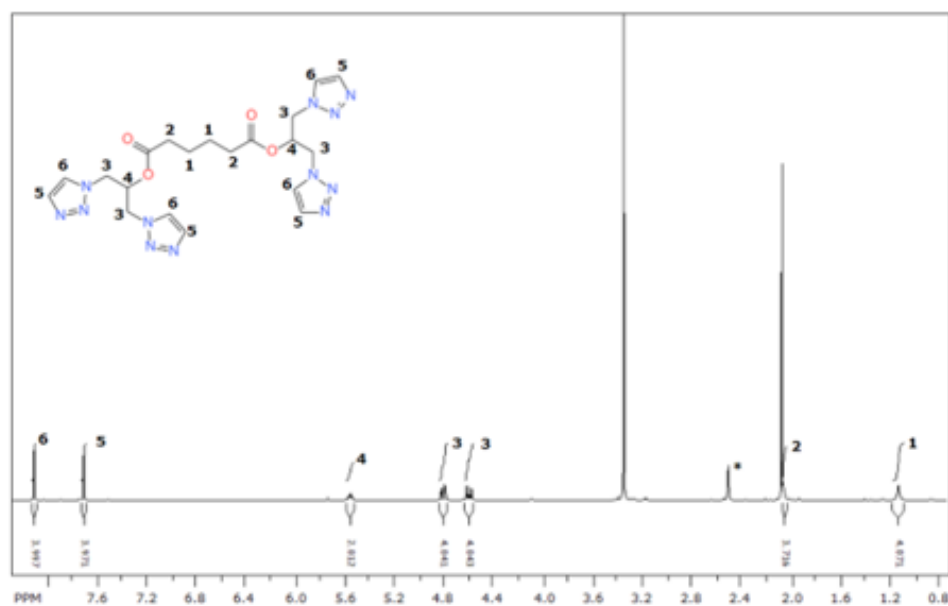

Figure S-9a. <sup>1</sup>H NMR of 1,6-bis[1-(1,2,3-triazol-1-yl)-3-(1,2,3-triazol-1-yl)propan-2-yl] adipate (10).

10

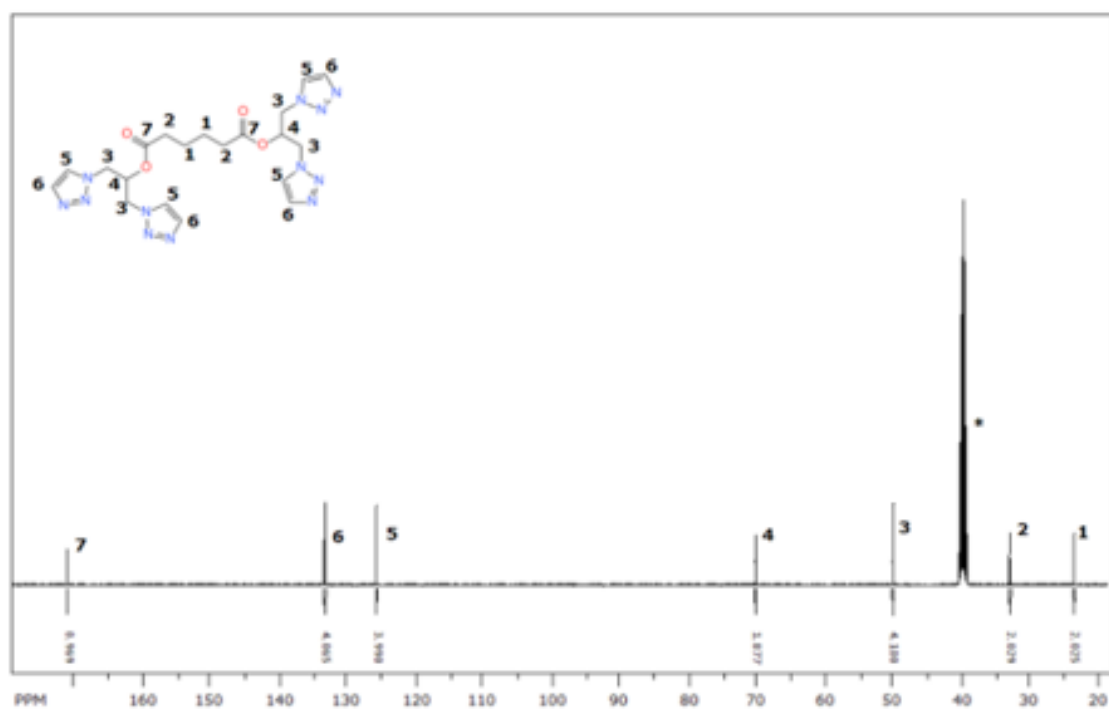

Figure S-9b. <sup>13</sup>C NMR of 1,6-bis[1-(1,2,3-triazol-1-yl)-3-(1,2,3-triazol-1-yl)propan-2-yl] adipate (10).

11

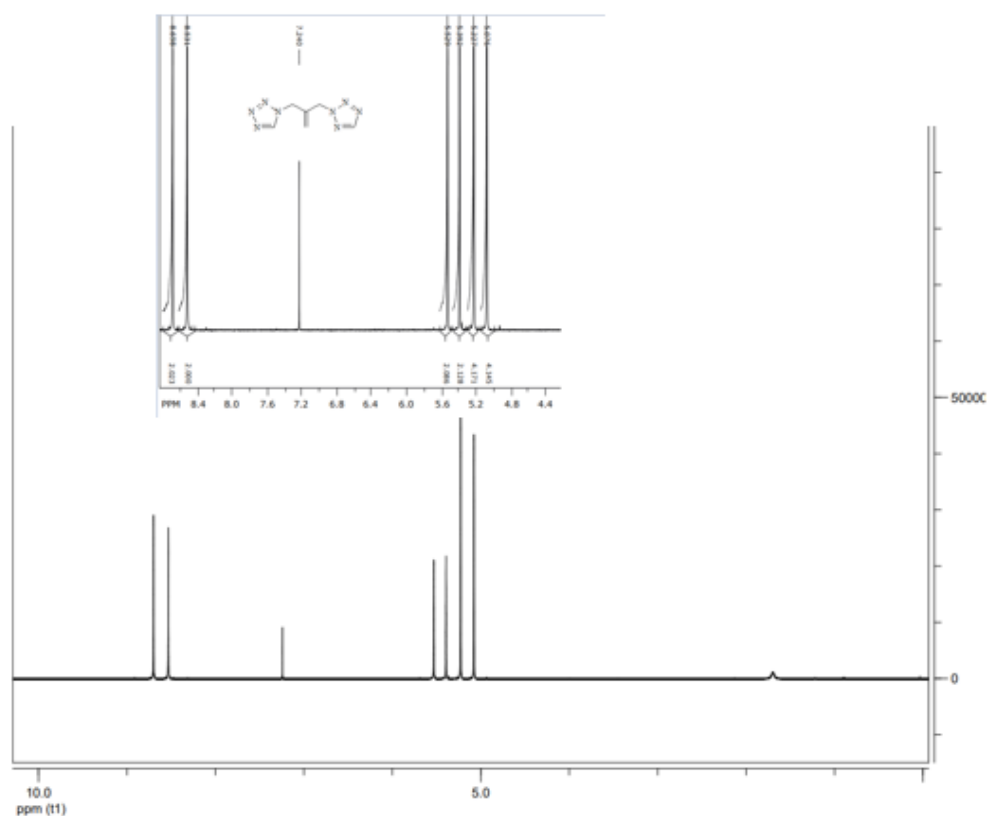

Figure S-10a.  $^1\text{H}$  NMR of 1-[2-(2H-tetrazol-2-ylmethyl)prop-2-en-1-yl]-1H-tetrazole (11).

11

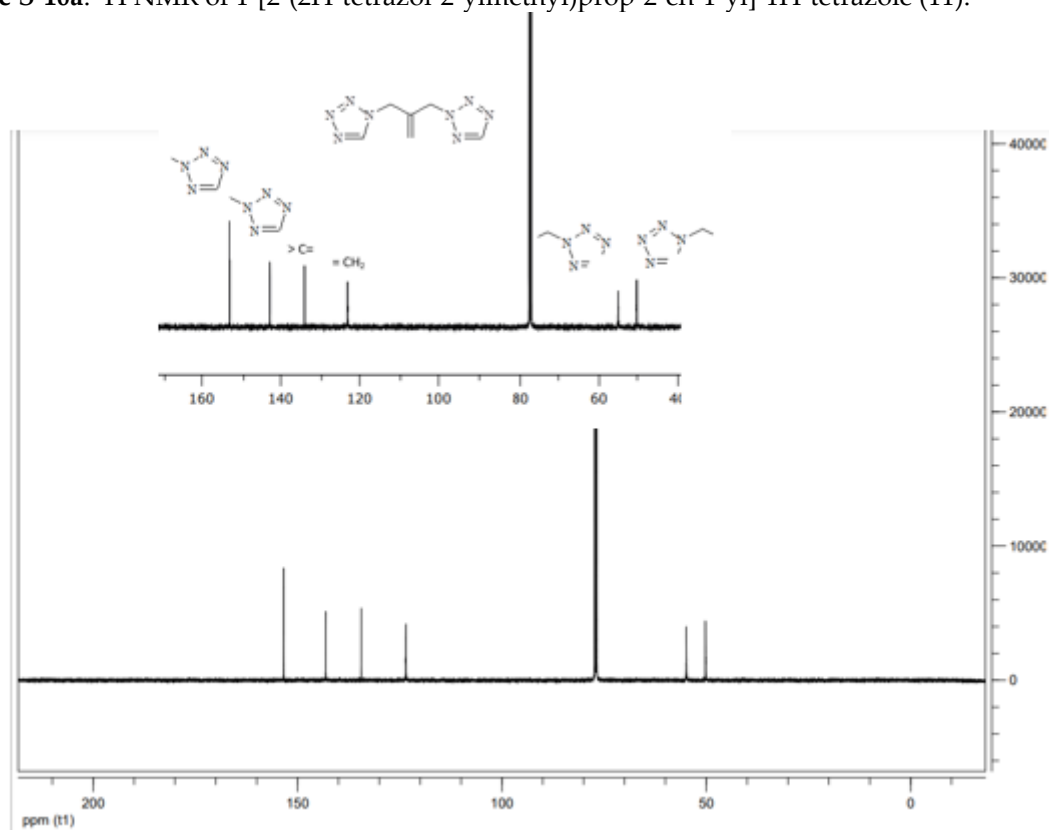

Figure S-10b.  $^{13}\text{C}$  NMR of 1-[2-(2H-tetrazol-2-ylmethyl)prop-2-en-1-yl]-1H-tetrazole (11).

12

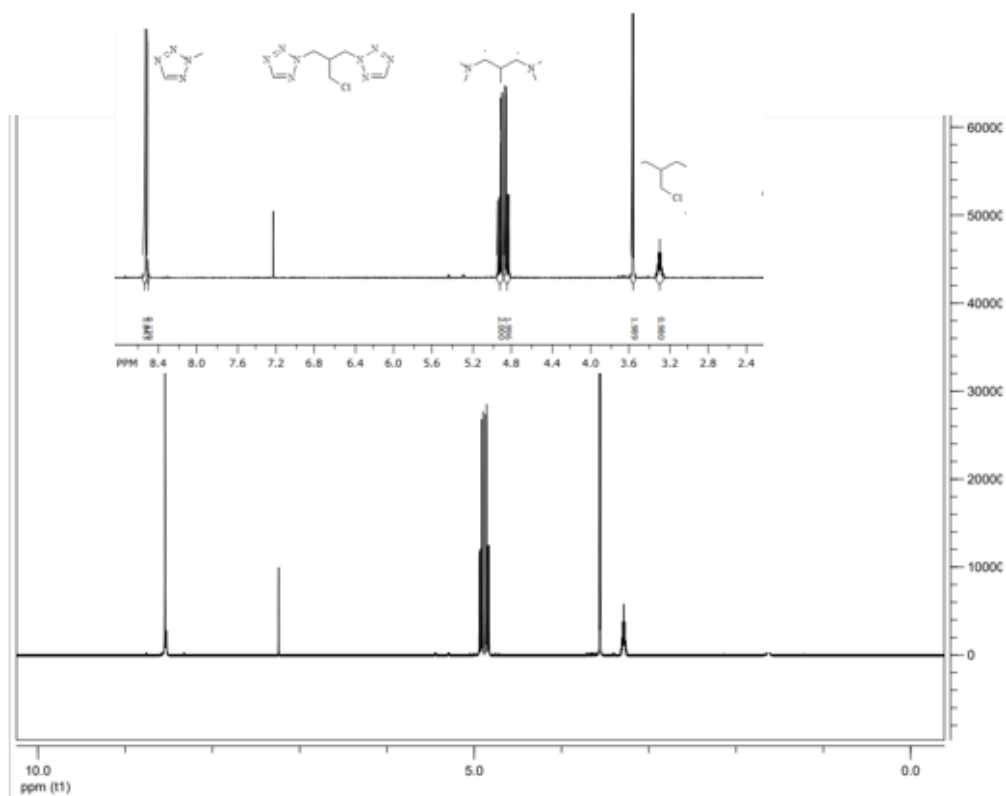

Figure S-11a.  $^1\text{H}$  NMR of 1,3-di(tetrazol-2-yl)-2-chloromethylpropane (12).

12

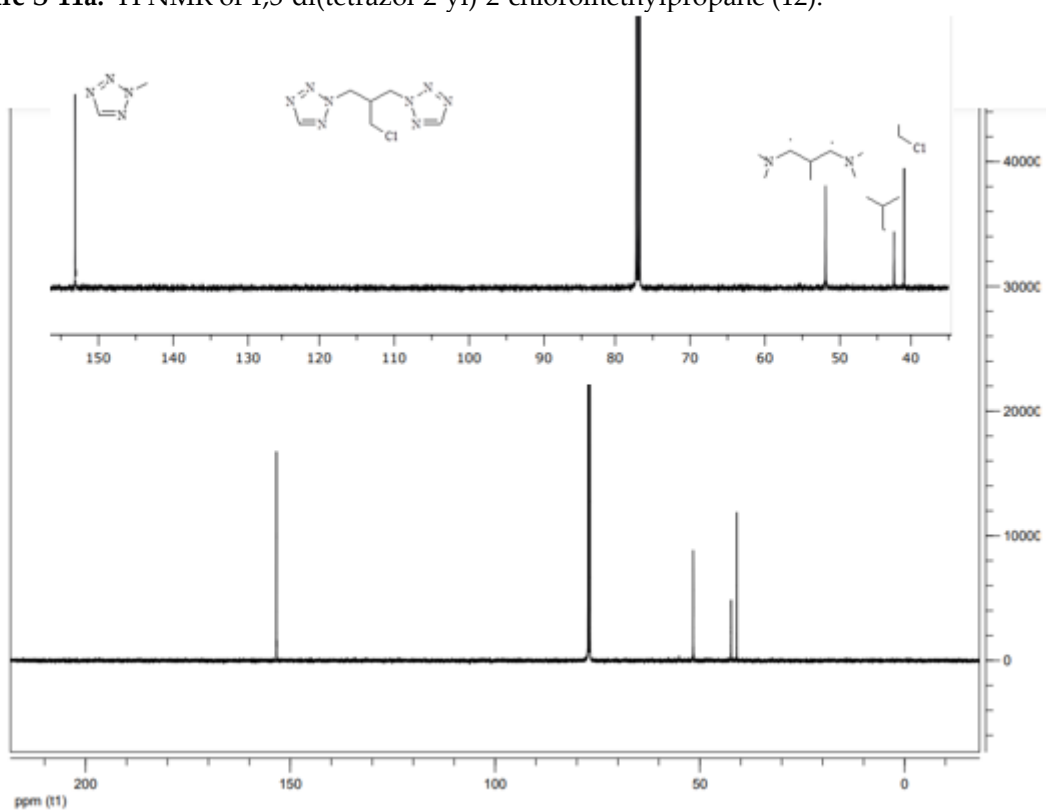

Figure S-11b.  $^{13}\text{C}$  NMR of 1,3-di(tetrazol-2-yl)-2-chloromethylpropane (12).

13

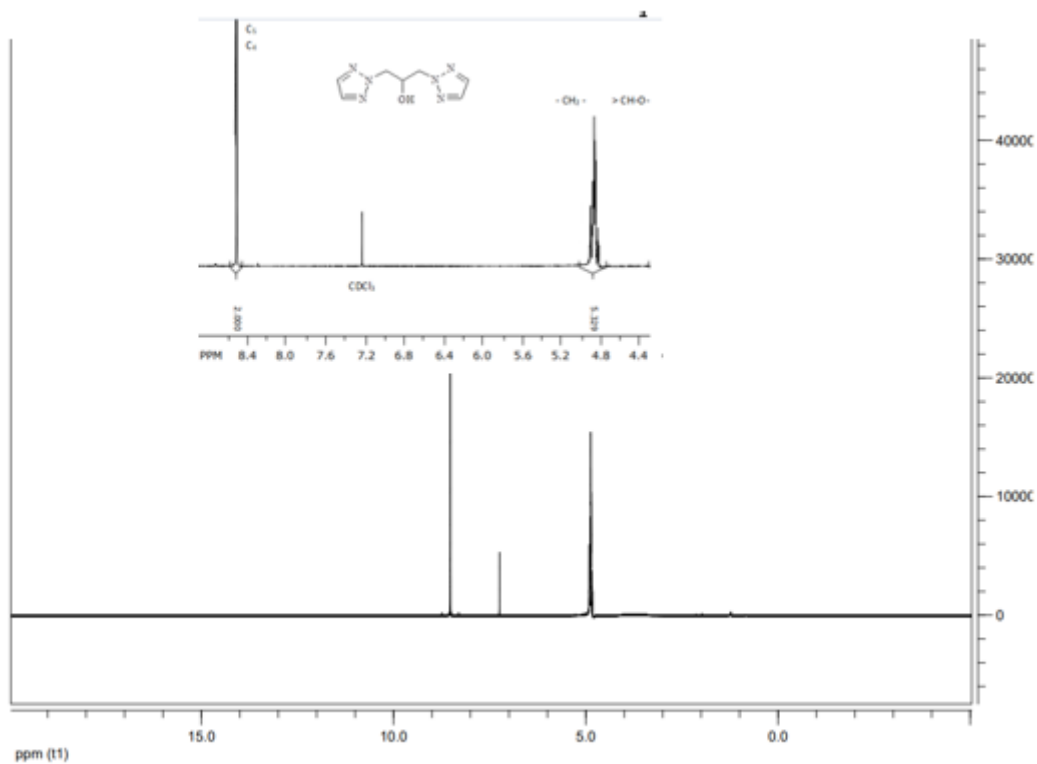

Figure S-12a. <sup>1</sup>H NMR of 1,3-di(1,2,3-triazol-2-yl)propan-2-ol (13).

13

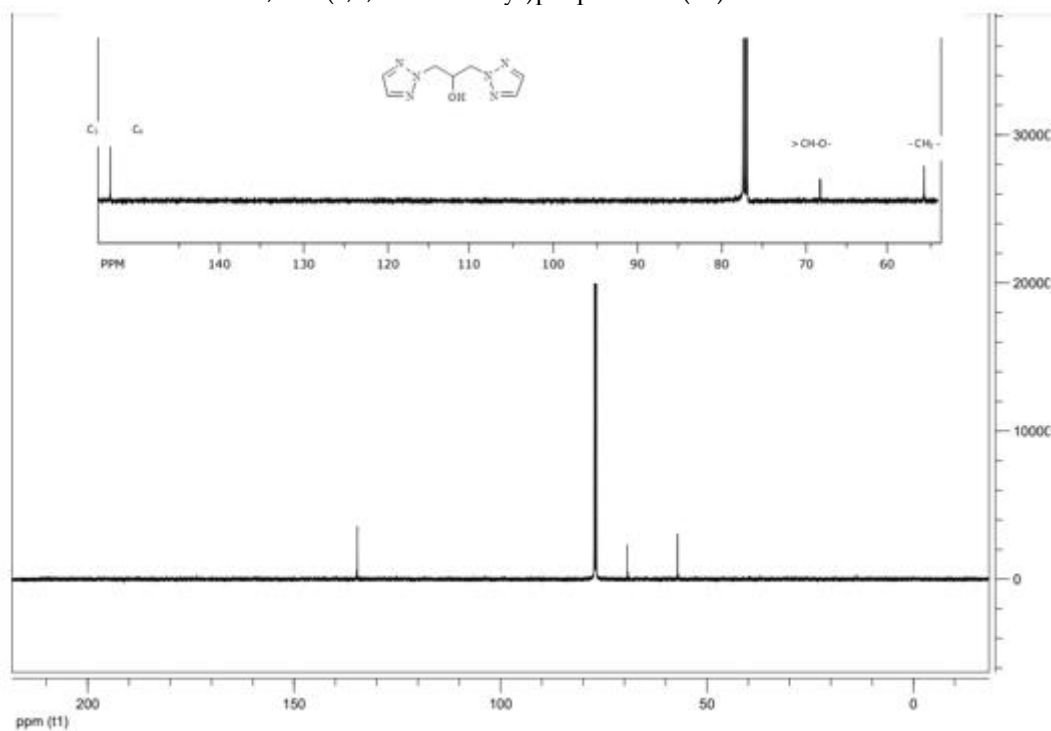

Figure S-12b. <sup>13</sup>C NMR of 1,3-di(1,2,3-triazol-2-yl)propan-2-ol (13).

14

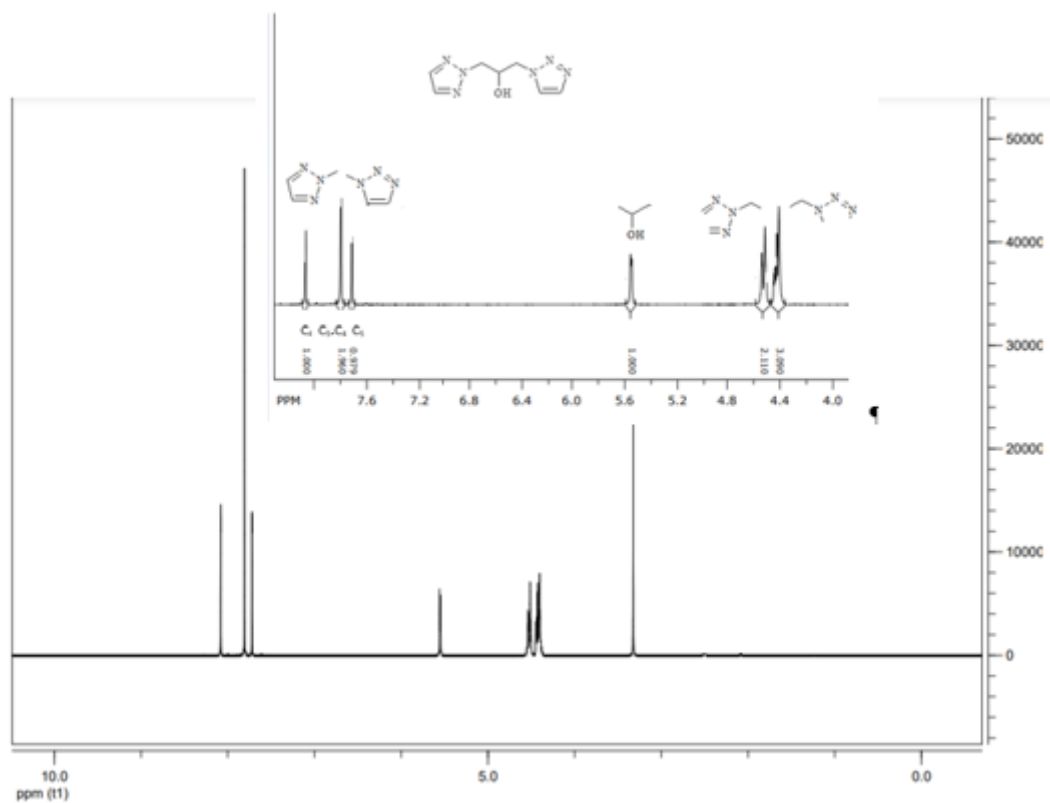

Figure S-13a.  $^1\text{H}$  NMR of 1-(1,2,3 triazol-1-yl)-3-(1,2,3-triazol-2-yl)propan-2-ol (14).

14

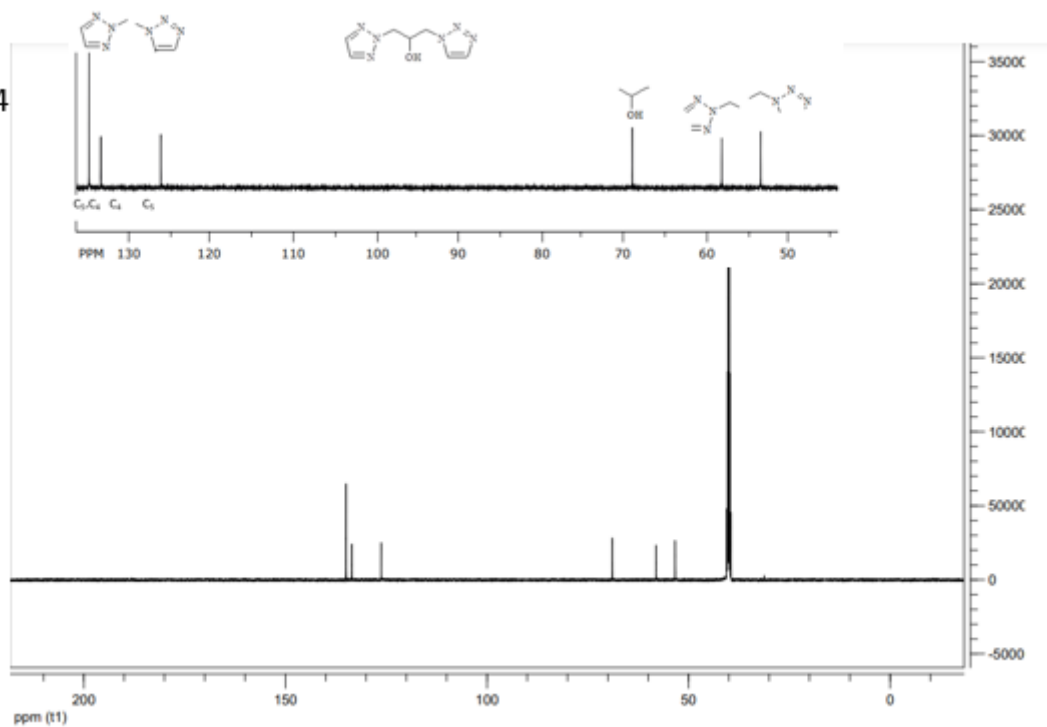

Figure S-13b.  $^{13}\text{C}$  NMR of 1-(1,2,3 triazol-1-yl)-3-(1,2,3-triazol-2-yl)propan-2-ol (14).

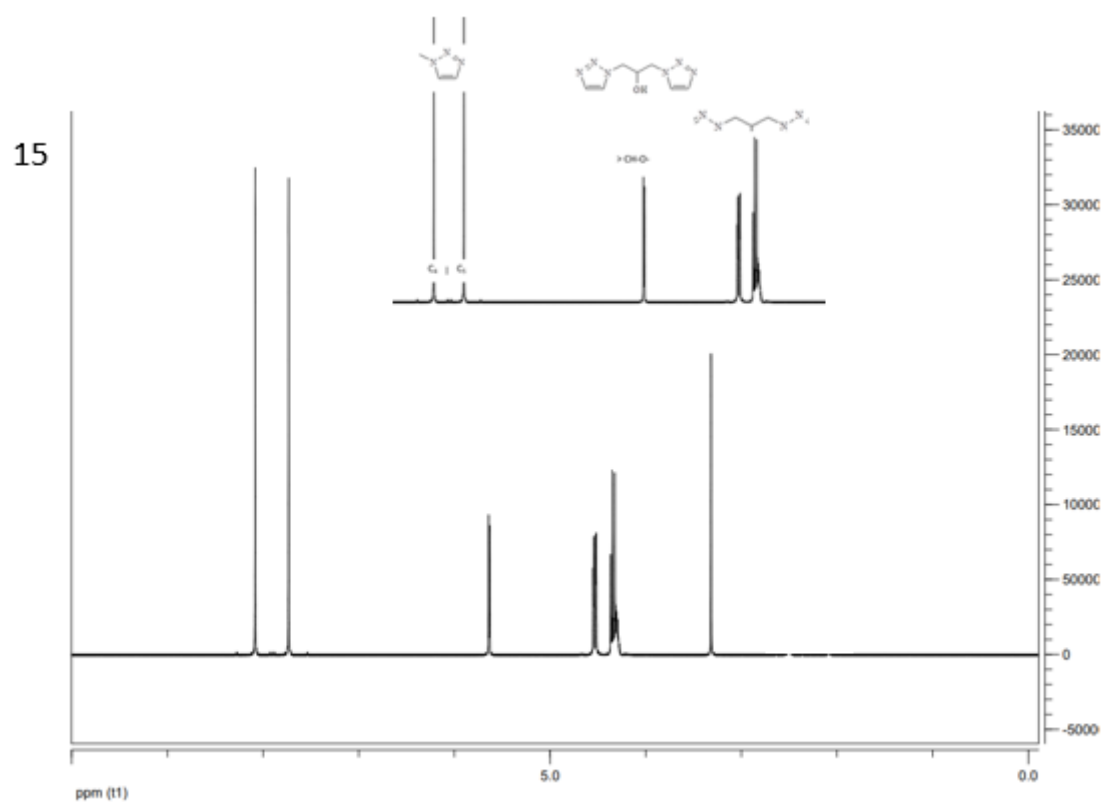

**Figure S-14a.**  $^1\text{H}$  NMR of 1,3-di(1,2,3-triazol-1-yl)propan-2-ol (15).

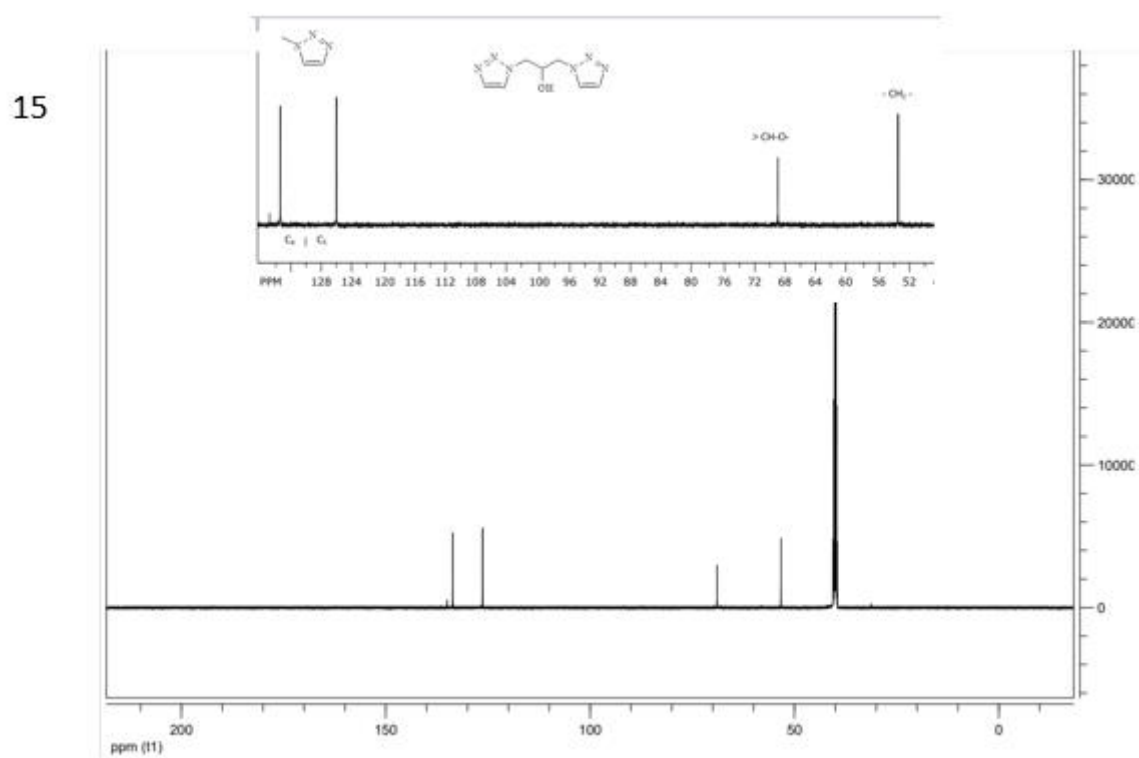

**Figure S-14b.**  $^{13}\text{C}$  NMR of 1,3-di(1,2,3-triazol-1-yl)propan-2-ol (15).

**Table S-1.** Experimentally determined fungistatic activity of fluconazole and lactones **2-4** and fluconazole analogues **5-15** derivative against *Candida albicans* ATCC 10231, *C. albicans* ATCC 2091, *C. zeylanoides* KKP 3528, and *C. guilliermondii* KKP 3390. MIC values are in µg/mL

|                                                                                                  |                   | Microorganism |           |          |          |          |
|--------------------------------------------------------------------------------------------------|-------------------|---------------|-----------|----------|----------|----------|
|                                                                                                  |                   | ATCC 10231    | ATCC 2091 | AM 38/20 | KKP 3390 | KKP 3528 |
| 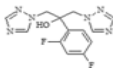<br><b>1</b>    | MIC <sub>50</sub> | 1.56          | 2.19      | 7.22     | 8.41     | 6.25     |
|                                                                                                  | MIC <sub>90</sub> | 6.25          | 5.57      | ≥18.0    | ≥18.0    | 18.75    |
| <br><b>2</b>    | MIC <sub>50</sub> | 45.55         | 30.79     | 78.52    | 55.0     | 46.29    |
|                                                                                                  | MIC <sub>90</sub> | 137.72        | 92.34     | 150.00   | 80.00    | 144.64   |
| <br><b>3</b>    | MIC <sub>50</sub> | 38.90         | 17.61     | 85.04    | 36.96    | 62.24    |
|                                                                                                  | MIC <sub>90</sub> | 150.12        | 110.0     | 157.76   | 58.95    | 151.13   |
| <br><b>4</b>    | MIC <sub>50</sub> | 62.72         | 20.10     | 49.49    | 46.15    | 58.56    |
|                                                                                                  | MIC <sub>90</sub> | 150.00        | 120.10    | 142.51   | 80.34    | 131.29   |
| <br><b>5</b>    | MIC <sub>50</sub> | 179.69        | 70.42     | 163.98   | 146.28   | 154.47   |
|                                                                                                  | MIC <sub>90</sub> | 300.0         | 280.95    | 330.65   | 258.96   | 278.42   |
| <br><b>6</b>    | MIC <sub>50</sub> | 225.0         | 69.18     | 118.89   | 95.90    | 174.27   |
|                                                                                                  | MIC <sub>90</sub> | 326.16        | 304.47    | 207.78   | 302.15   | 276.84   |
| <br><b>7</b>  | MIC <sub>50</sub> | 194.05        | 82.90     | 203.95   | 146.29   | 164.73   |
|                                                                                                  | MIC <sub>90</sub> | 296.0         | 145.40    | 303.95   | 260.57   | 293.34   |
| <br><b>8</b>  | MIC <sub>50</sub> | 201.41        | 127.11    | 225.0    | 144.84   | 119.27   |
|                                                                                                  | MIC <sub>90</sub> | 292.32        | 265.04    | 300.0    | 269.84   | 301.09   |
| <br><b>9</b>  | MIC <sub>50</sub> | 197.50        | 122.71    | 226.45   | 148.29   | 180.24   |
|                                                                                                  | MIC <sub>90</sub> | 308.61        | 265.57    | 408.27   | 265.94   | 322.59   |
| <br><b>10</b> | MIC <sub>50</sub> | 133.49        | 107.75    | 166.64   | 68.98    | 38.45    |
|                                                                                                  | MIC <sub>90</sub> | 225.44        | 274.42    | 348.45   | 132.48   | 212.36   |
| <br><b>11</b> | MIC <sub>50</sub> | 249.16        | 173.34    | 260.81   | 118.60   | -        |
|                                                                                                  | MIC <sub>90</sub> | 378.19        | 345.02    | 414.65   | 185.26   | 300.00   |
| <br><b>12</b> | MIC <sub>50</sub> | 162.67        | 139.41    | 224.32   | 127.48   | 192.37   |
|                                                                                                  | MIC <sub>90</sub> | 329.33        | 277.34    | 321.88   | 203.82   | 297.63   |
| <br><b>13</b> | MIC <sub>50</sub> | 122.29        | 170.59    | 150.0    | -        | -        |
|                                                                                                  | MIC <sub>90</sub> | 219.85        | 295.59    | 304.74   | 56.54    | 167.54   |
| <br><b>14</b> | MIC <sub>50</sub> | 149.78        | 128.43    | 208.80   | 77.89    | -        |
|                                                                                                  | MIC <sub>90</sub> | 297.93        | 262.21    | 325.42   | 107.52   | 120.45   |
| <br><b>15</b> | MIC <sub>50</sub> | 138.23        | 154.11    | 140.03   | 45.48    | 75.0     |
|                                                                                                  | MIC <sub>90</sub> | 221.56        | 302.26    | 300.0    | 94.26    | 300.0    |

ATCC 10231-*Candida albicans* ATCC 10231,

ATCC 2091-*C. albicans* ATCC 2091,

AM 38/20- *C. albicans* AM 38/20.

KKP 3528-*C. zeylanoides* KKP 3528,

KKP 3390-*C. guilliermondii* KKP 3390.

MIC<sub>50</sub> (the amount of fungistatic substance (in µg/mL) inhibiting yeast growth by 50%)

MIC<sub>90</sub> (the amount of fungistatic substance (in µg/mL) inhibiting yeast growth by 90%)

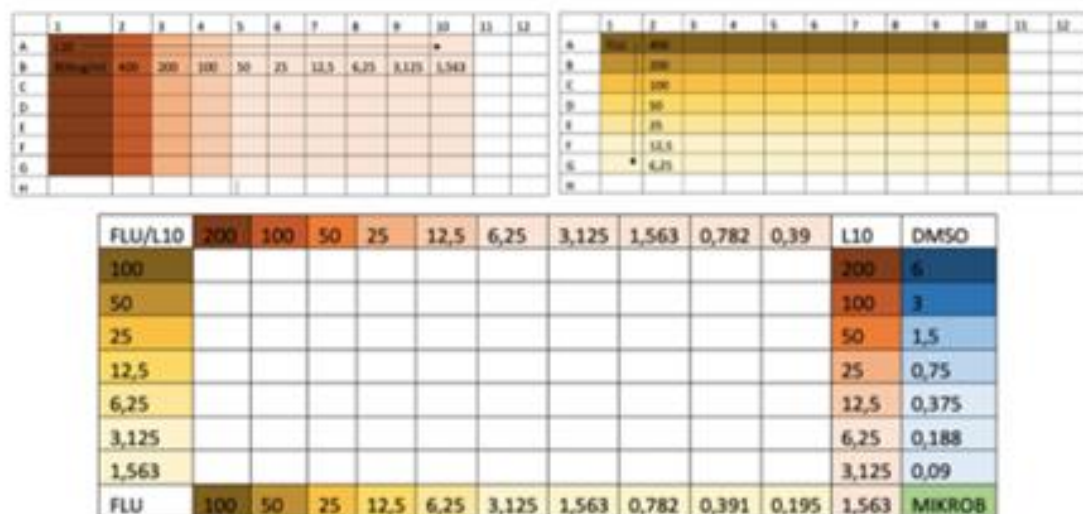

**Figure S-15a.** Graphical display of microplate used in checkboard method. Using double dilutions, a series systems consisting of phthalide lactone (L10) and chemical compound (FLU) were made. The plate designed in this way was inoculated with the microorganism under study (Private archive).

|   | 1     | 2     | 3     | 4     | 5     | 6     | 7     | 8     | 9     | 10    | 11    | 12    |
|---|-------|-------|-------|-------|-------|-------|-------|-------|-------|-------|-------|-------|
| A | 0,109 | 0,081 | 0,093 | 0,102 | 0,13  | 0,124 | 0,134 | 0,103 | 0,136 | 0,093 | 0,116 | 0,352 |
| B | 0,094 | 0,096 | 0,124 | 0,258 | 0,295 | 0,317 | 0,376 | 0,402 | 0,412 | 0,468 | 0,158 | 0,538 |
| C | 0,094 | 0,094 | 0,132 | 0,366 | 0,465 | 0,677 | 0,744 | 0,77  | 0,696 | 0,868 | 0,429 | 0,634 |
| D | 0,101 | 0,104 | 0,24  | 0,441 | 0,551 | 0,704 | 0,751 | 0,572 | 0,69  | 0,766 | 0,538 | 0,614 |
| E | 0,107 | 0,112 | 0,347 | 0,554 | 0,693 | 0,913 | 0,834 | 0,811 | 0,853 | 1,115 | 0,767 | 0,771 |
| F | 0,094 | 0,234 | 0,234 | 0,604 | 0,59  | 0,835 | 0,718 | 0,92  | 1,036 | 0,92  | 0,685 | 0,61  |
| G | 0,081 | 0,111 | 0,241 | 0,647 | 0,705 | 0,612 | 0,916 | 0,846 | 0,899 | 0,806 | 0,87  | 0,818 |
| H | 0,102 | 0,23  | 0,422 | 0,703 | 0,769 | 0,696 | 0,556 | 0,825 | 0,797 | 0,7   | 0,72  | 0,537 |
|   | 1     | 2     | 3     | 4     | 5     | 6     | 7     | 8     | 9     | 10    | 11    | 12    |
| A | 0,108 | 0,081 | 0,092 | 0,103 | 0,133 | 0,127 | 0,138 | 0,104 | 0,141 | 0,094 | 0,114 | 0,376 |
| B | 0,094 | 0,096 | 0,125 | 0,264 | 0,306 | 0,32  | 0,379 | 0,404 | 0,416 | 0,476 | 0,148 | 0,539 |
| C | 0,094 | 0,094 | 0,132 | 0,368 | 0,466 | 0,679 | 0,75  | 0,783 | 0,706 | 0,889 | 0,44  | 0,626 |
| D | 0,101 | 0,105 | 0,242 | 0,444 | 0,555 | 0,708 | 0,759 | 0,577 | 0,696 | 0,775 | 0,542 | 0,591 |
| E | 0,106 | 0,109 | 0,345 | 0,548 | 0,695 | 0,918 | 0,838 | 0,816 | 0,859 | 1,122 | 0,77  | 0,762 |
| F | 0,094 | 0,237 | 0,221 | 0,602 | 0,583 | 0,833 | 0,708 | 0,915 | 1,033 | 0,916 | 0,659 | 0,582 |
| G | 0,081 | 0,11  | 0,234 | 0,632 | 0,696 | 0,576 | 0,9   | 0,827 | 0,882 | 0,788 | 0,851 | 0,797 |
| H | 0,102 | 0,23  | 0,4   | 0,676 | 0,746 | 0,671 | 0,526 | 0,805 | 0,779 | 0,671 | 0,702 | 0,527 |

**Figure S-15b.** Results of crude OD values for *C. albicans* ATCC 109231 in repetition for the FIC assay between compounds 2 and 8 from Gen5 program (Private archive).
